# Supplementary material for: Utilizing quantum fingerprints in plant cells to evaluate plant productivity
Source: Royal Society of Chemistry journal article supplement (doi:10.1039/d5an00326a), 2025-01-01
Supplement: d5an00326a1.pdf [file d5an00326a1.pdf]

### Supplementary Information

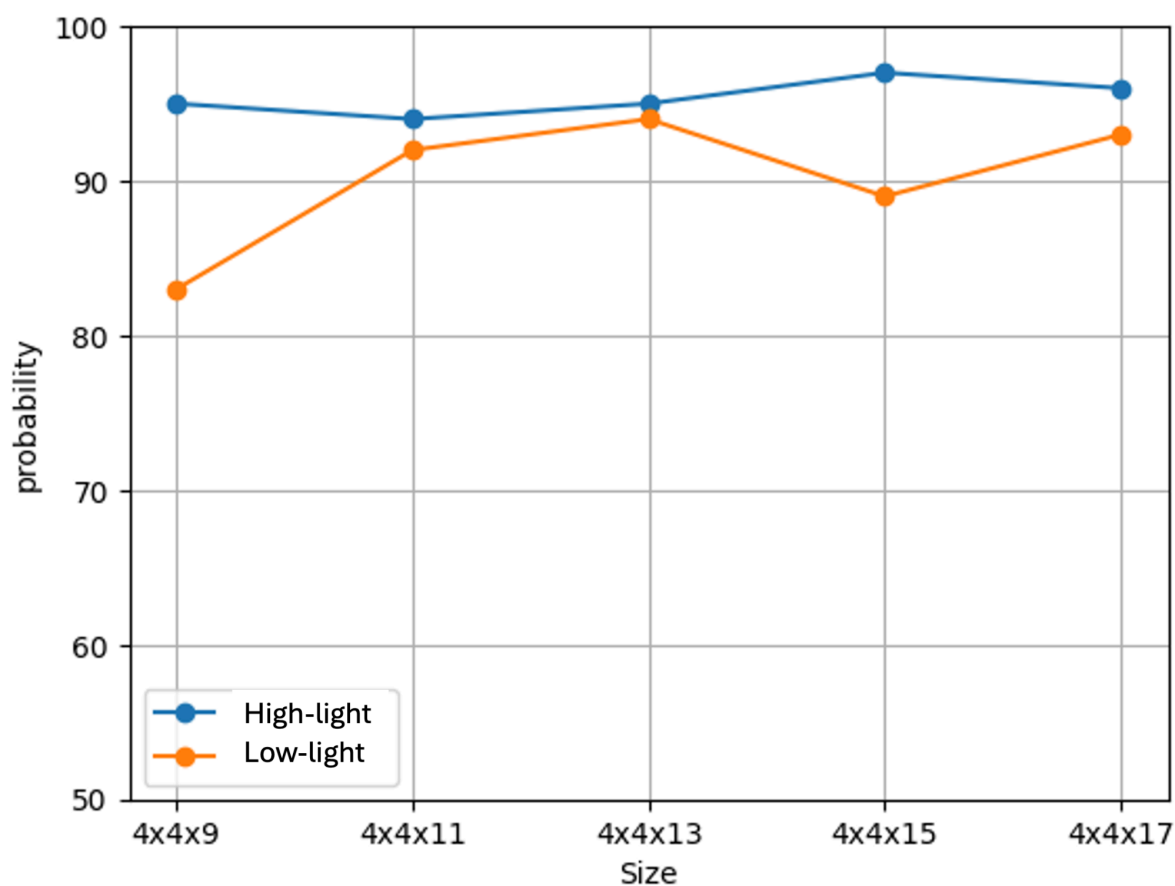

**Figure X1:** Dependence of CNN classification probabilities for high-light (HL) and low-light (LL) samples on time bin count  $n=4,5,6,7,8$ .
